# Supplementary material
Source: PubMed Central journal article supplement (PMC11302360)

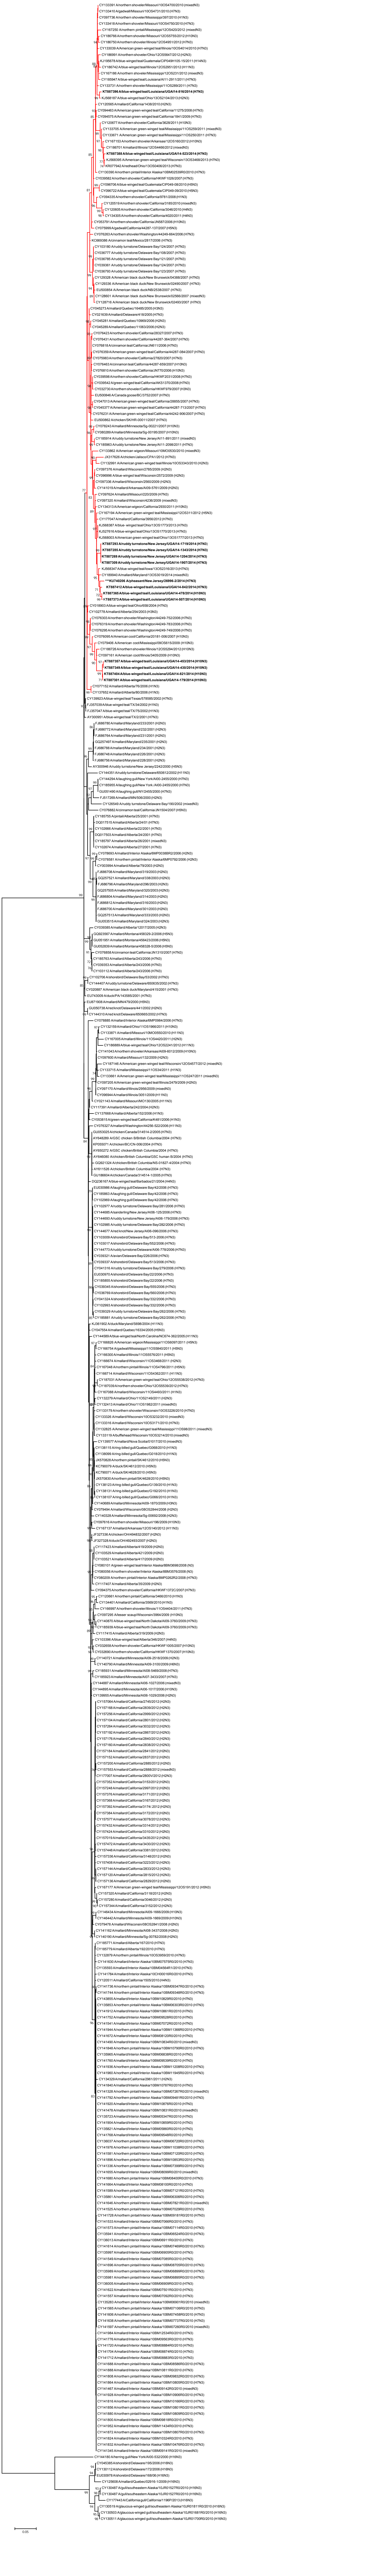

CY133391 A/northern shoveler/Missouri/100S4700/2010 (mixedN3)

CY133410 A/gadwall/Missouri/100S4371/2010 (H7N3)

CY097736 A/northern shoveler/Mississippi/3972010 (H1N3)

CY133418 A/northern shoveler/Missouri/100S4740/2010 (H7N3)

CY167250 A/northern pintail/Mississippi/120S420/2012 (mixedN3)

CY186766 A/northern shoveler/Missouri/120S5755/2012 (H1N3)

CY186750 A/northern shoveler/Illinois/120S4951/2012 (H7N3)

CY133039 A/American green-winged teal/Illinois/100S404/12/2010 (H7N3)

CY186991 A/northern shoveler/Ohio/120S5647/2012 (H2N3)

KJ195678 A/blue-winged teal/Guatemala/CIP049H105-15/2011 (H14N3)

CY186742 A/blue-winged teal/Illinois/120S2951/2012 (H1N3)

CY167186 A/northern shoveler/Mississippi/120S231/2012 (mixedN3)

CY185947 A/blue-winged teal/Louisiana/A111-291/2011 (H7N3)

CY133373 A/northern shoveler/Mississippi/110S289/2011 (H7N3)

**KT887396 A/blue-winged teal/Louisiana/UGAI14-8162014 (H7N3)**

KJ568187 A/blue-winged teal/Ohio/130S2104/2013 (H2N3)

CY120565 A/mallard/California/1438/2010 (H2N3)

CY094463 A/American green-winged teal/California/1841/2009 (H7N3)

CY094575 A/American green-winged teal/California/1841/2009 (H7N3)

CY120677 A/northern shoveler/California/3628/2011 (H10N3)

CY133705 A/American green-winged teal/Mississippi/110S259/2011 (mixedN3)

CY167153 A/northern shoveler/Arkansas/120S160/2012 (H10N3)

CY186701 A/mallard/Illinois/120S4466/2012 (mixedN3)

**KT887388 A/blue-winged teal/Louisiana/UGAI14-523/2014 (H7N3)**

KJ568395 A/American green-winged teal/Wisconsin/130S3498/2013 (H7N3)

KR077942 A/hedhead/Ohio/130S0406/2013 (H2N3)

CY130390 A/northern pintail/Interior Alaska/HKWF1026/2010 (H5N3)

CY095662 A/northern shoveler/California/HKWF1026/2010 (H5N3)

CY096706 A/blue-winged teal/Guatemala/CIP049-09/2010 (H5N3)

CY096722 A/blue-winged teal/Guatemala/CIP049-09/2010 (H5N3)

CY094335 A/northern shoveler/California/9781/2008 (H1N3)

CY120519 A/northern shoveler/California/3185/2010 (mixedN3)

CY134305 A/northern shoveler/California/3046/2010 (H4N3)

CY134305 A/northern shoveler/California/4020/2011 (H4N3)

CY057991 A/northern shoveler/California/JN587/2006 (H1N3)

CY075998 A/gadwall/California/44287-13/7507 (H5N3)

CY076263 A/northern shoveler/Washington/14249-664/2006 (H7N3)

K066856 A/cinnamon teal/Maryland/2817/2008 (H1N3)

CY103160 A/ruddy turnstone/Delaware Bay/124/2007 (H7N3)

CY038777 A/ruddy turnstone/Delaware Bay/108/2007 (H7N3)

CY038785 A/ruddy turnstone/Delaware Bay/121/2007 (H7N3)

CY038361 A/ruddy turnstone/Delaware Bay/124/2007 (H7N3)

CY038793 A/ruddy turnstone/Delaware Bay/123/2007 (H7N3)

CY129328 A/American black duck/New Brunswick/04388/2007 (H7N3)

CY129336 A/American black duck/New Brunswick/02490/2007 (H7N3)

EU500854 A/American black duck/IN/82539/2007 (H7N3)

CY128601 A/American black duck/New Brunswick/02566/2007 (mixedN3)

CY128716 A/American black duck/New Brunswick/02493/2007 (H7N3)

CY045273 A/mallard/Quebec/16485/2005 (H3N3)

CY021639 A/mallard/Delaware/418/2005 (H7N3)

CY045281 A/mallard/Quebec/10969/2006 (H2N3)

CY045289 A/mallard/Quebec/11063/2006 (H2N3)

CY076423 A/northern shoveler/California/28327/2007 (H7N3)

CY076431 A/northern shoveler/California/44287-364/2007 (H7N3)

CY076818 A/cinnamon teal/California/JN611/2006 (H7N3)

CY076359 A/American green-winged teal/California/44287-084/2007 (H7N3)

CY075983 A/northern shoveler/California/27820/2007 (H7N3)

CY076463 A/cinnamon teal/California/44287-659/2007 (H10N3)

CY076810 A/northern shoveler/California/JN770/2006 (H10N3)

CY039568 A/northern shoveler/California/HKWF130/2008 (H7N3)

CY039542 A/green-winged teal/California/HKWF130/2008 (H7N3)

CY032730 A/northern shoveler/California/HKWF979/2007 (H3N3)

EU500846 A/Canada goose/BC/3752/2007 (H7N3)

CY047013 A/American green-winged teal/California/28855/2007 (H7N3)

CY045377 A/American green-winged teal/California/44287-713/2007 (H7N3)

CY076231 A/American green-winged teal/California/4424-906/2007 (H7N3)

EU500862 A/chicken/SK/HR-0001/1/2007 (H7N3)

CY185914 A/ruddy turnstone/New Jersey/A111-891/2011 (mixedN3)

CY185963 A/ruddy turnstone/New Jersey/A111-2098/2011 (H7N3)

CY133862 A/American wigeon/Missouri/10M05030/2010 (mixedN3)

JX317626 A/chicken/Jalisco/CPA1/12/1012 (H7N3)

CY132991 A/American green-winged teal/Illinois/100S3343/2010 (H2N3)

CY097376 A/mallard/Wisconsin/2785/2009 (H2N3)

CY096996 A/blue-winged teal/Wisconsin/2572/2009 (H2N3)

CY097336 A/mallard/Wisconsin/2560/2009 (H2N3)

CY097620 A/mallard/Wisconsin/4236/2009 (mixedN3)

CY134313 A/American wigeon/California/2930/2011 (H10N3)

CY167194 A/American green-winged teal/Mississippi/120S311/2012 (H5N3)

CY177047 A/mallard/California/3956/2012 (H7N3)

KJ568387 A/blue-winged teal/Ohio/130S1770/2013 (H7N3)

KJ568003 A/American green-winged teal/Ohio/130S1770/2013 (H7N3)

**KT887293 A/ruddy turnstone/New Jersey/UGAI14-1719/2014 (H7N3)**

**KT887285 A/ruddy turnstone/New Jersey/UGAI14-1343/2014 (H7N3)**

**KT887269 A/ruddy turnstone/New Jersey/UGAI14-1907/2014 (H7N3)**

KJ568347 A/blue-winged teal/Iowa/130S2316/2013 (H7N3)

CY169940 A/mallard/Maryland/130S3016/2014 (mixedN3)

**KT887412 A/blue-winged teal/Louisiana/UGAI14-842/2014 (H10N3)**

**KT887365 A/blue-winged teal/Louisiana/UGAI14-478/2014 (H10N3)**

**KT887373 A/blue-winged teal/Louisiana/UGAI14-507/2014 (H10N3)**

CY018903 A/blue-winged teal/Ohio/858/2004 (H7N3)

CY102778 A/mallard/Alberta/254/2003 (H3N3)

CY076303 A/northern shoveler/Washington/14249-752/2006 (H7N3)

CY076319 A/northern shoveler/Washington/14249-783/2006 (H7N3)

CY076295 A/northern shoveler/Washington/14249-749/2006 (H7N3)

CY076095 A/American coot/California/20181-006/2007 (H10N3)

CY078406 A/American coot/Mississippi/0905815/2009 (H10N3)

CY186726 A/northern shoveler/Illinois/120S5294/2012 (H10N3)

CY097161 A/American coot/Illinois/3405/2009 (H10N3)

**KT887357 A/blue-winged teal/Louisiana/UGAI14-453/2014 (H10N3)**

**KT887349 A/blue-winged teal/Louisiana/UGAI14-430/2014 (H10N3)**

**KT887404 A/blue-winged teal/Louisiana/UGAI14-821/2014 (H10N3)**

**KT887301 A/blue-winged teal/Louisiana/UGAI14-179/2014 (H10N3)**

CY077152 A/mallard/Alberta/76/2006 (H1N3)

CY137652 A/mallard/Alberta/80/2006 (H1N3)

CY139923 A/blue-winged teal/Texas/578585/2002 (H7N3)

FJ357039 A/blue-winged teal/TX/34/2002 (H1N3)

FJ357047 A/blue-winged teal/TX/75/2002 (H1N3)

AY300951 A/blue-winged teal/TX/2/2001 (H7N3)

FJ686772 A/mallard/Maryland/233/2001 (H2N3)

FJ686780 A/mallard/Maryland/232/2001 (H2N3)

FJ686784 A/mallard/Maryland/231/2001 (H2N3)

GQ257497 A/mallard/Maryland/235/2001 (H2N3)

FJ686788 A/mallard/Maryland/234/2001 (H2N3)

FJ686748 A/mallard/Maryland/226/2001 (H2N3)

FJ686756 A/mallard/Maryland/228/2001 (H2N3)

AY300946 A/ruddy turnstone/New Jersey/2242/2000 (H5N3)

CY144351 A/ruddy turnstone/Delaware/650612/2002 (H11N3)

CY144294 A/laughing gull/New York/A100-2455/2000 (H7N3)

CY185955 A/laughing gull/New York/A100-2455/2000 (H7N3)

GU051490 A/laughing gull/NY/2455/2000 (H7N3)

FJ512769 A/mallard/MN/508/2000 (H2N3)

CY126549 A/ruddy turnstone/Delaware Bay/190/2002 (mixedN3)

CY076882 A/cinnamon teal/California/JN1504/2007 (H5N3)

CY185755 A/pintail/Alberta/25/2001 (H7N3)

DQ017515 A/mallard/Alberta/24/01 (H7N3)

CY102666 A/mallard/Alberta/22/2001 (H7N3)

DQ017503 A/mallard/Alberta/24/2001 (H7N3)

CY185787 A/mallard/Alberta/26/2001 (mixedN3)

CY102674 A/mallard/Alberta/27/2001 (H7N3)

CY078693 A/mallard/Interior Alaska/6MP00388R/2/2006 (H2N3)

CY078581 A/northern pintail/Interior Alaska/6MP0762/2006 (H2N3)

CY100394 A/mallard/Alberta/79/2003 (H2N3)

FJ686769 A/mallard/Maryland/319/2003 (H2N3)

GQ257521 A/mallard/Maryland/326/2003 (H2N3)

FJ686796 A/mallard/Maryland/326/2003 (H2N3)

GQ257505 A/mallard/Maryland/320/2003 (H2N3)

FJ686804 A/mallard/Maryland/314/2003 (H2N3)

FJ686812 A/mallard/Maryland/316/2003 (H2N3)

FJ686790 A/mallard/Maryland/301/2003 (H2N3)

GQ257513 A/mallard/Maryland/333/2003 (H2N3)

GU053515 A/mallard/Maryland/324/2003 (H2N3)

CY039385 A/mallard/Alberta/12017/2005 (H2N3)

GQ253567 A/mallard/Montana/458329-2/2006 (H5N3)

GU051951 A/mallard/Montana/456423/2006 (H5N3)

GU052839 A/mallard/Montana/458328-5/2006 (H5N3)

CY076858 A/cinnamon teal/California/JN1310/2007 (H7N3)

CY185763 A/mallard/Alberta/243/2006 (H7N3)

CY039353 A/mallard/Alberta/243/2006 (H7N3)

CY103312 A/mallard/Alberta/243/2006 (H7N3)

CY102706 A/shorebird/Delaware Bay/53/2002 (H7N3)

CY144407 A/ruddy turnstone/Delaware/650635/2002 (H7N3)

CY020887 A/American black duck/Maryland/415/2001 (H7N3)

EU743009 A/duck/PA/143585/2001 (H7N3)

EU871908 A/mallard/MN/479/2000 (H5N3)

GU050738 A/red knot/Delaware/650665/2002 (H2N3)

CY144310 A/red knot/Delaware/650665/2002 (H2N3)

CY078885 A/mallard/Interior Alaska/6MP0984/2006 (H7N3)

CY132159 A/mallard/Ohio/110S1966/2011 (H10N3)

CY133871 A/mallard/Missouri/10M0550/2010 (H11N3)

CY167005 A/mallard/Illinois/110S4420/2011 (H2N3)

CY186889 A/blue-winged teal/Ohio/120S224/2012 (H11N3)

CY141043 A/northern shoveler/Arkansas/A109-6012/2009 (H7N3)

CY097600 A/mallard/Missouri/132/2009 (H2N3)

CY187146 A/American green-winged teal/Wisconsin/120S4577/2012 (mixedN3)

CY133715 A/mallard/Mississippi/110S34/2011 (H1N3)

CY133661 A/American green-winged teal/Mississippi/110S247/2011 (mixedN3)

CY097205 A/American green-winged teal/Illinois/2479/2009 (H2N3)

CY097170 A/mallard/Illinois/2956/2009 (mixedN3)

CY096944 A/mallard/Illinois/3051/2009 (H11N3)

CY021143 A/mallard/Missouri/130/2005 (H11N3)

CY117391 A/mallard/Alberta/242/2004 (H2N3)

CY137668 A/mallard/Alberta/152/2006 (H4N3)

CY053815 A/green-winged teal/California/K481/2006 (H1N3)

CY076327 A/mallard/Washington/44256-522/2006 (H11N3)

AY648289 A/GSC chicken/Canada/31454-2/2005 (H7N3)

KP0556071 A/chicken/BC/CN-006/2004 (H7N3)

AY650272 A/GSC chicken/British Columbia/2004 (H7N3)

AY646080 A/chicken/British Columbia/GSC human 8/2004 (H7N3)

GQ821324 A/chicken/British Columbia/NS-01827-4/2004 (H7N3)

AY611526 A/chicken/British Columbia/2004 (H7N3)

GU186604 A/chicken/Canada/31454-1/2005 (H7N3)

DQ236167 A/blue-winged teal/Barbados/21/2004 (H4N3)

EU030989 A/laughing gull/Delaware Bay/42/2006 (H7N3)

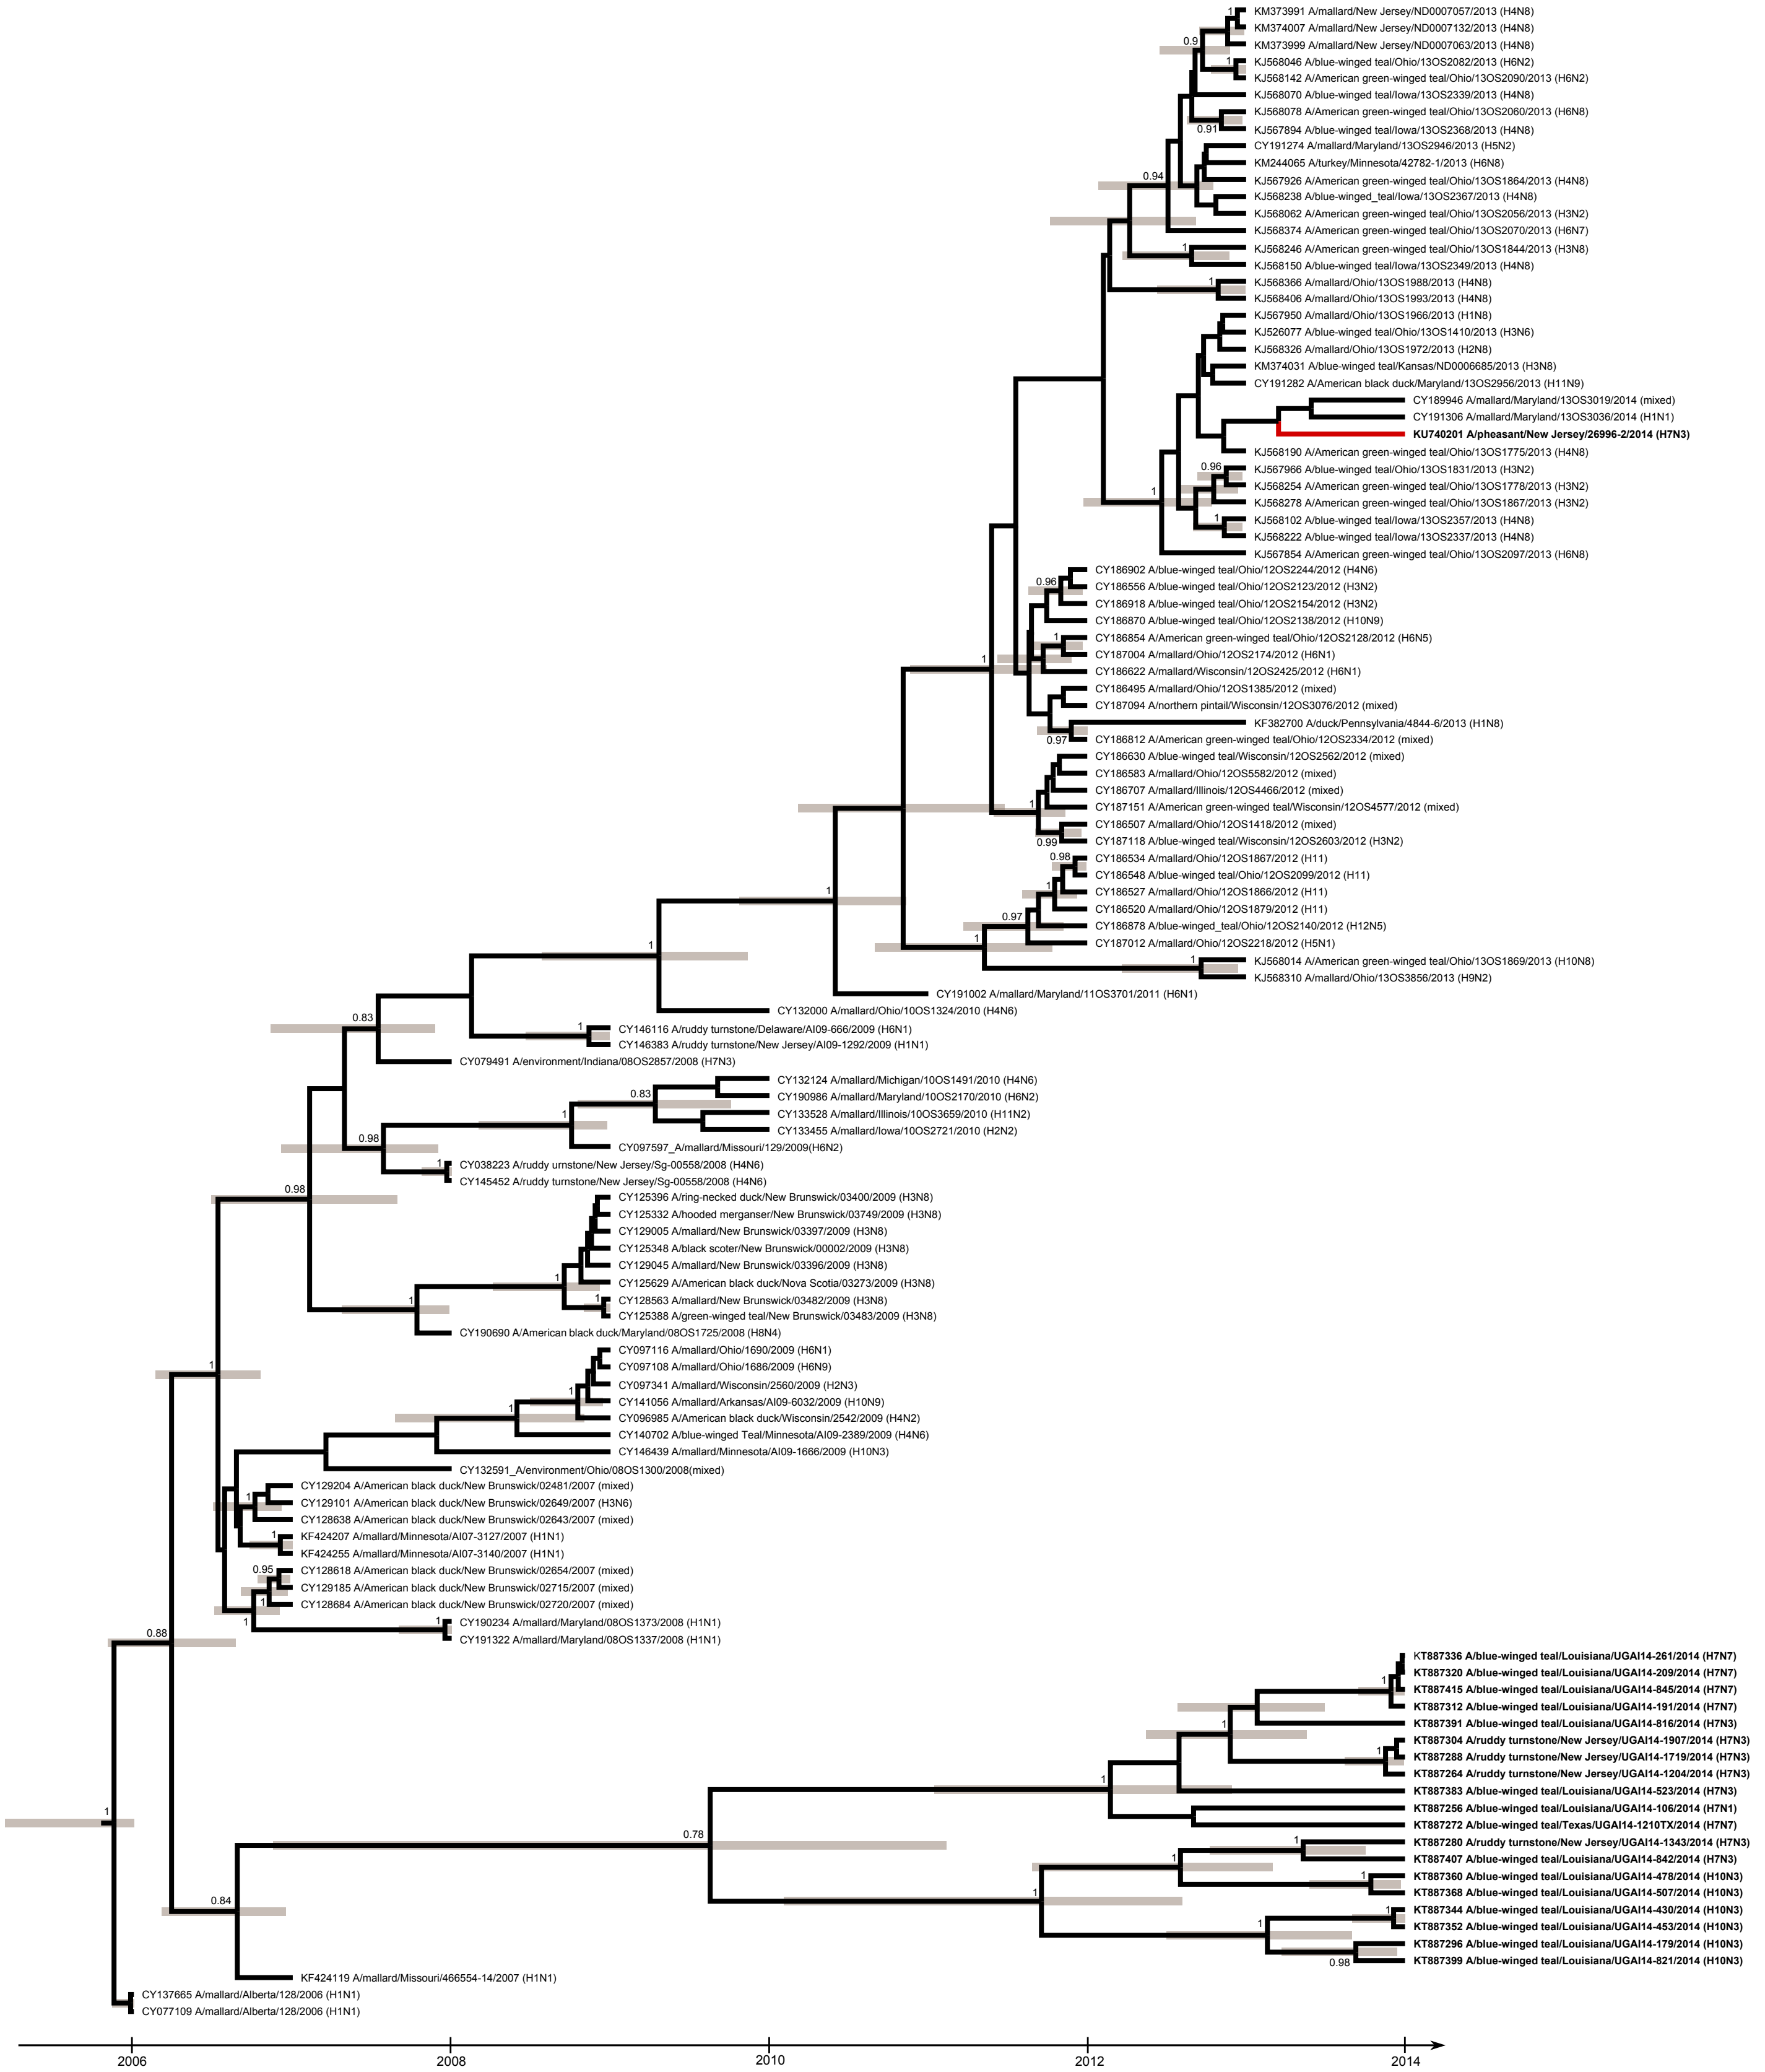



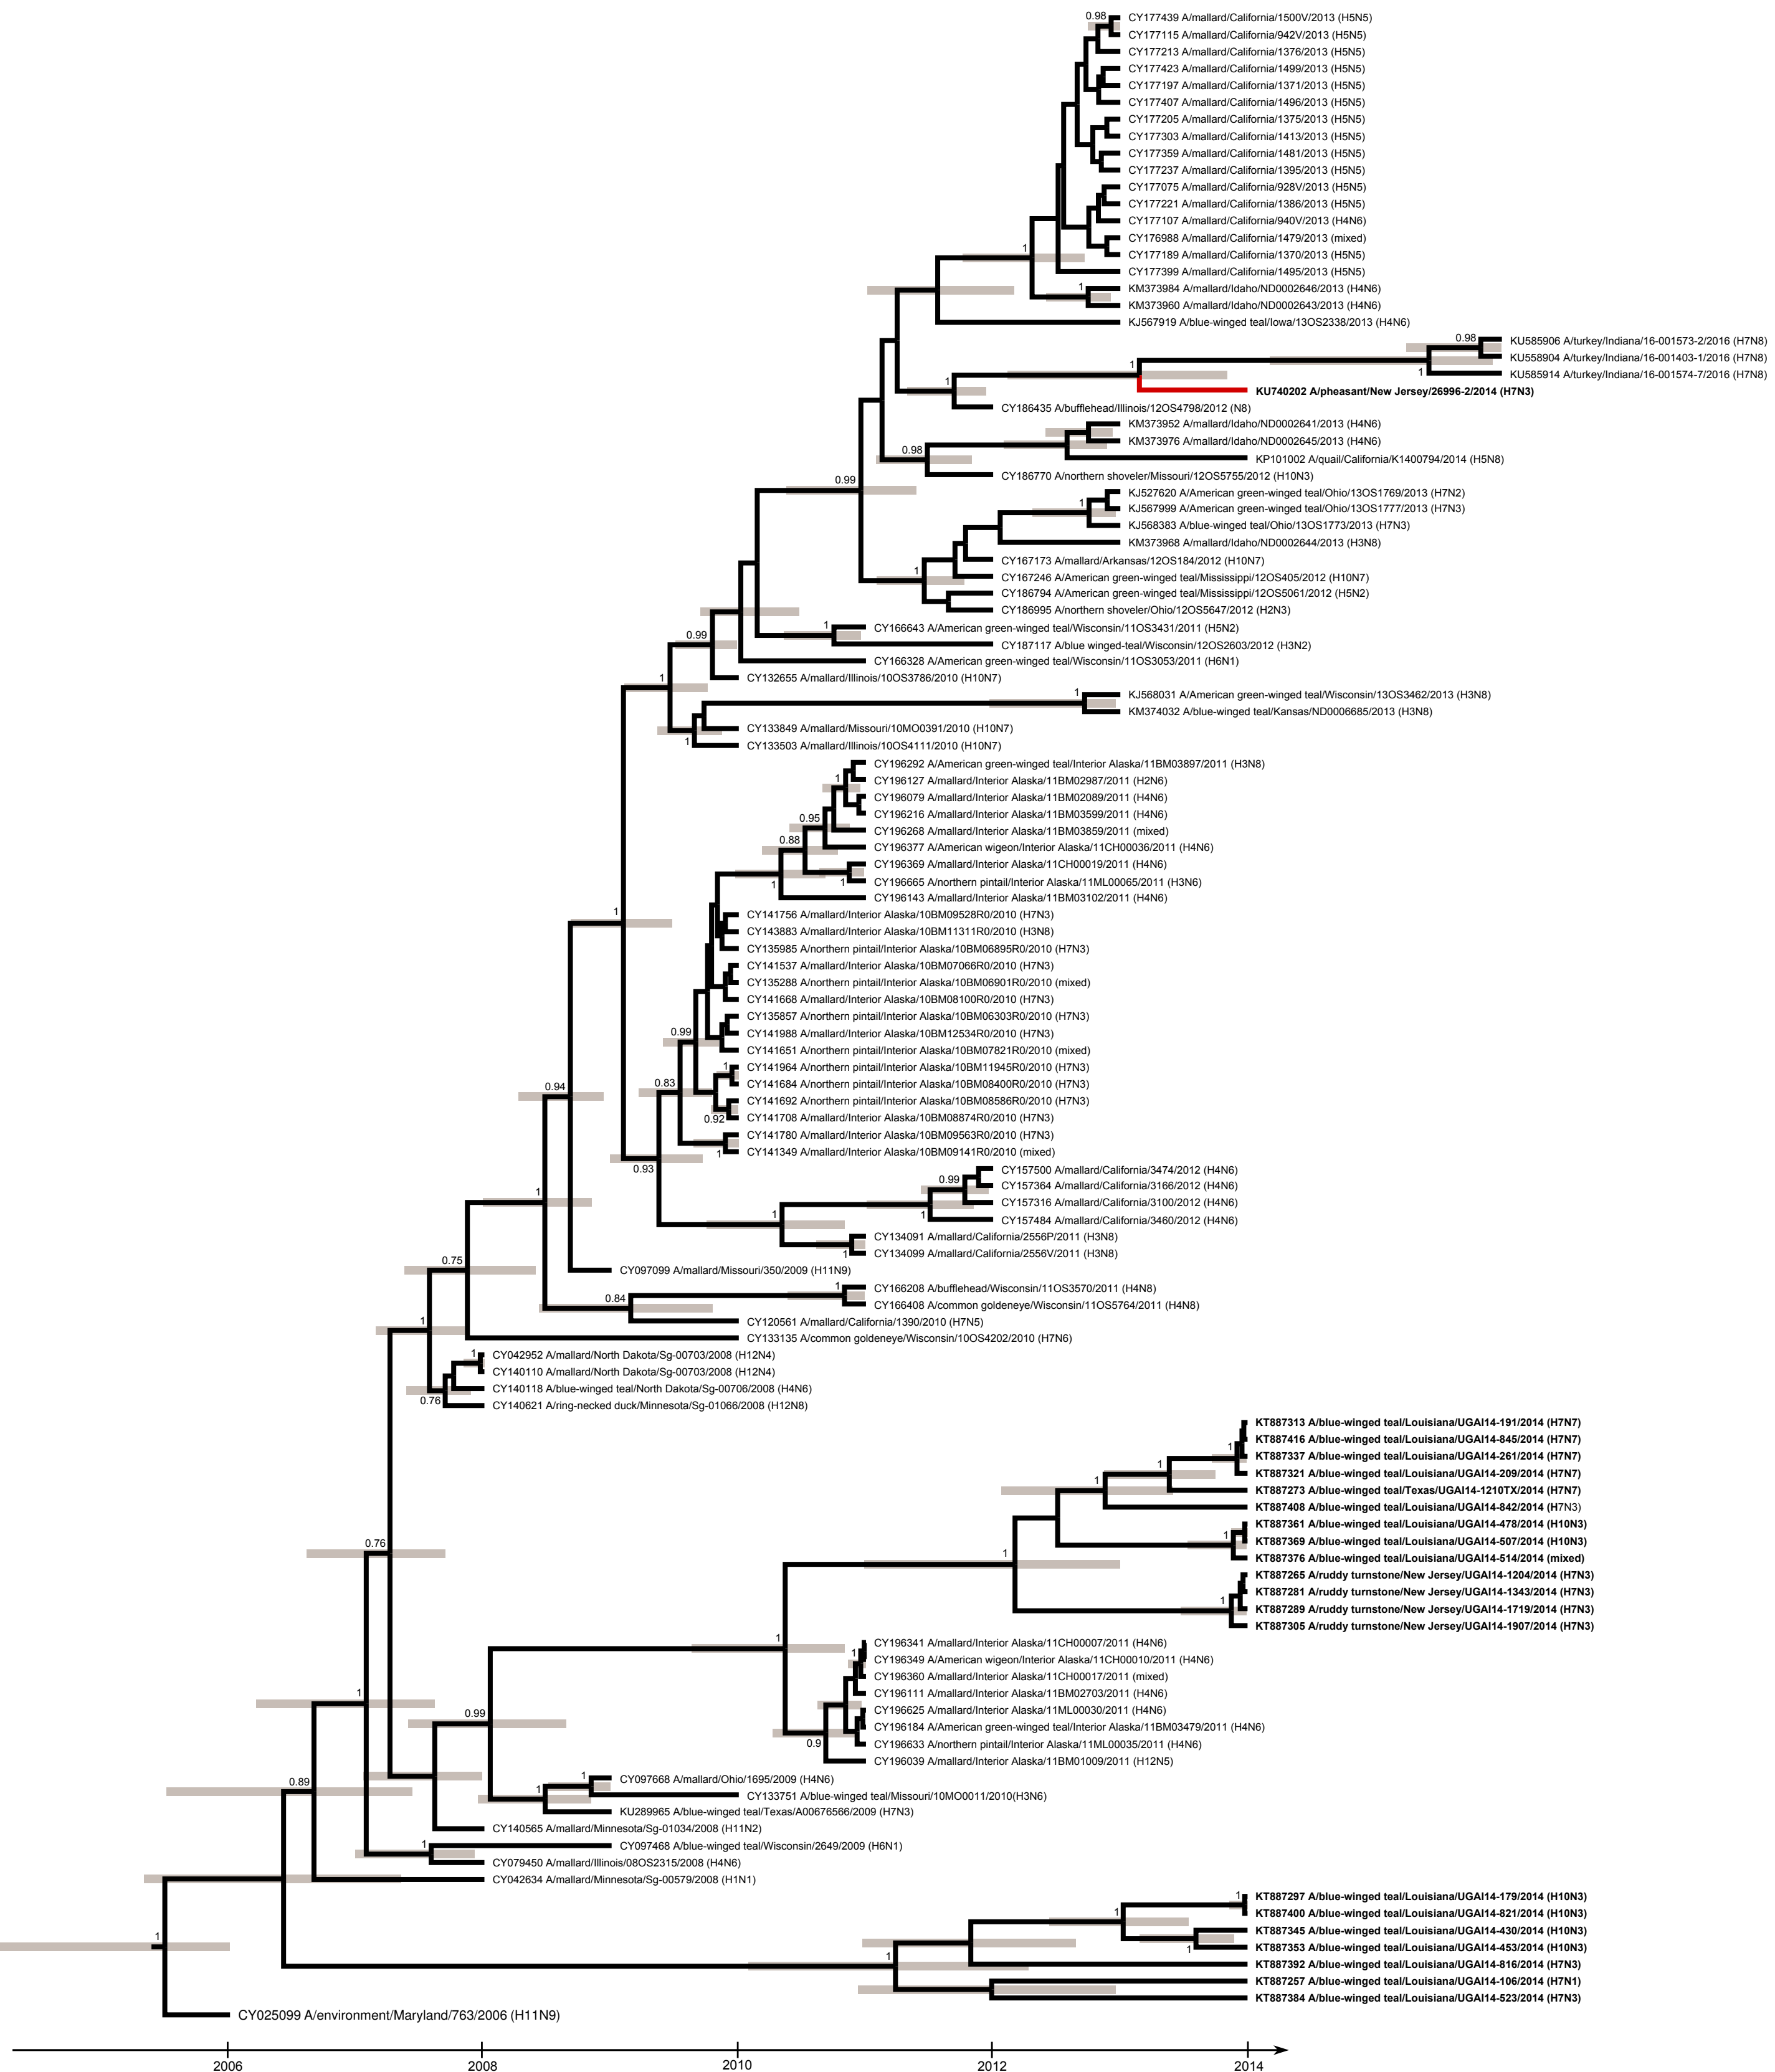

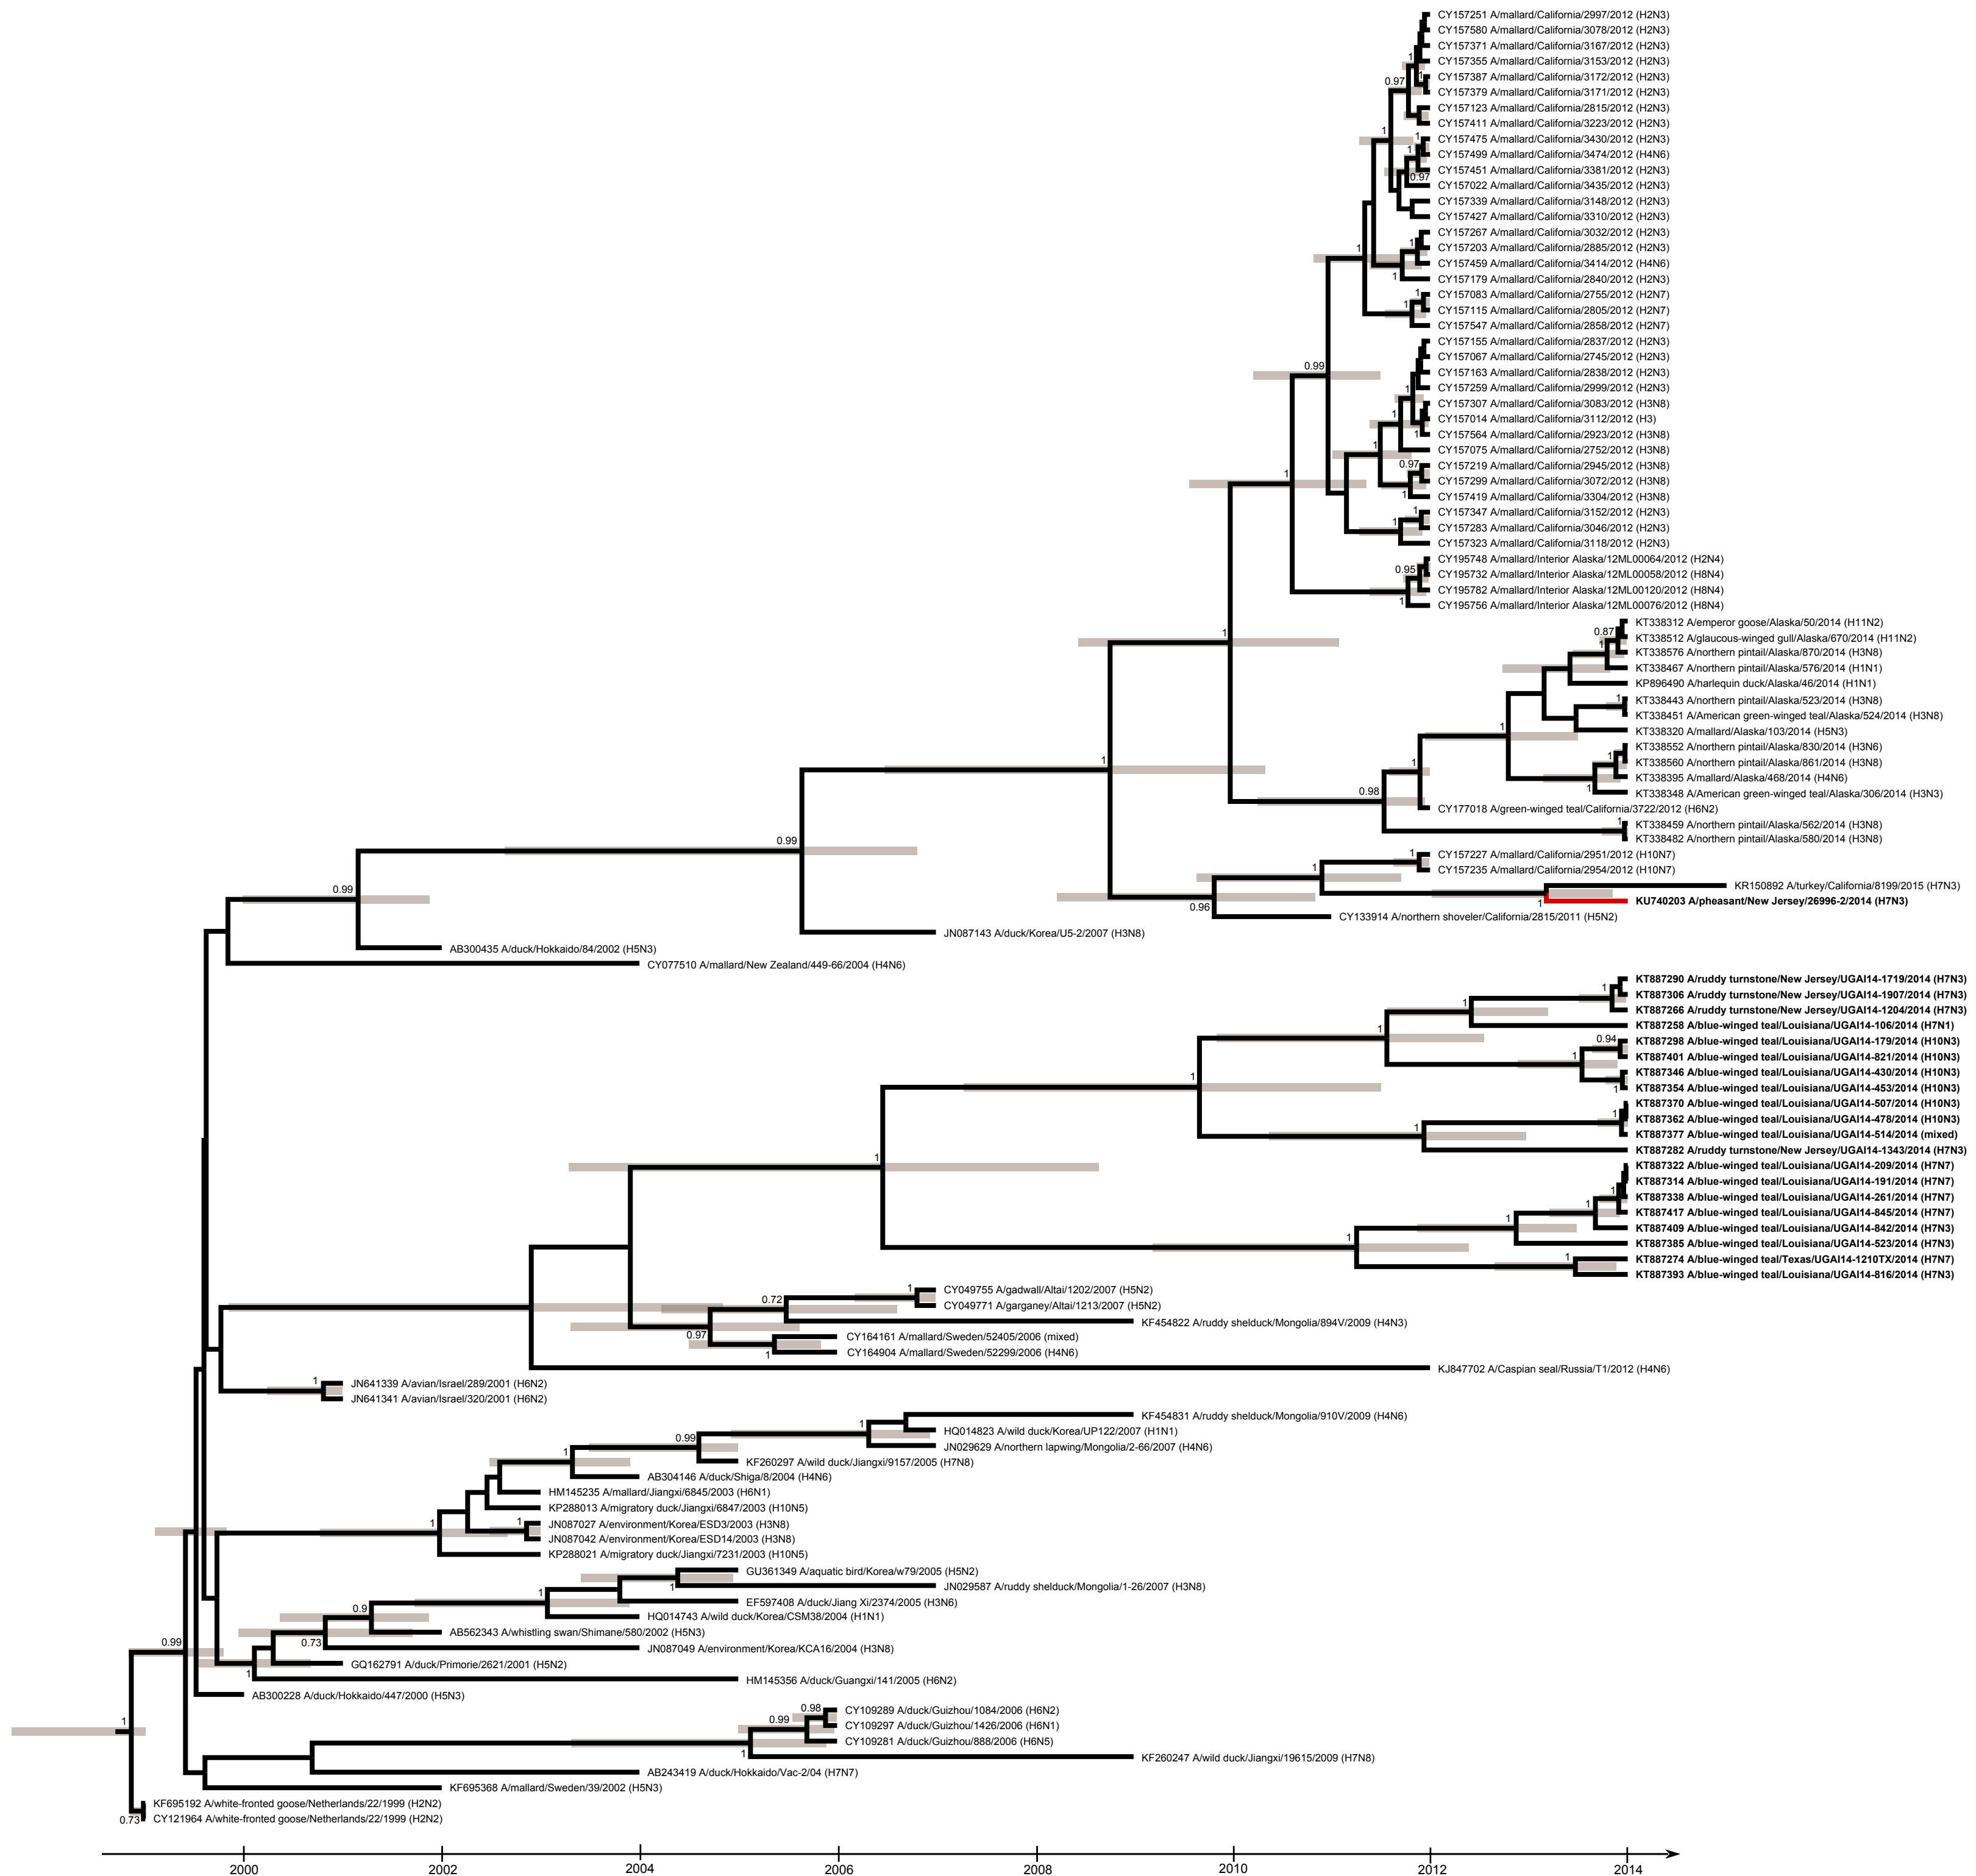

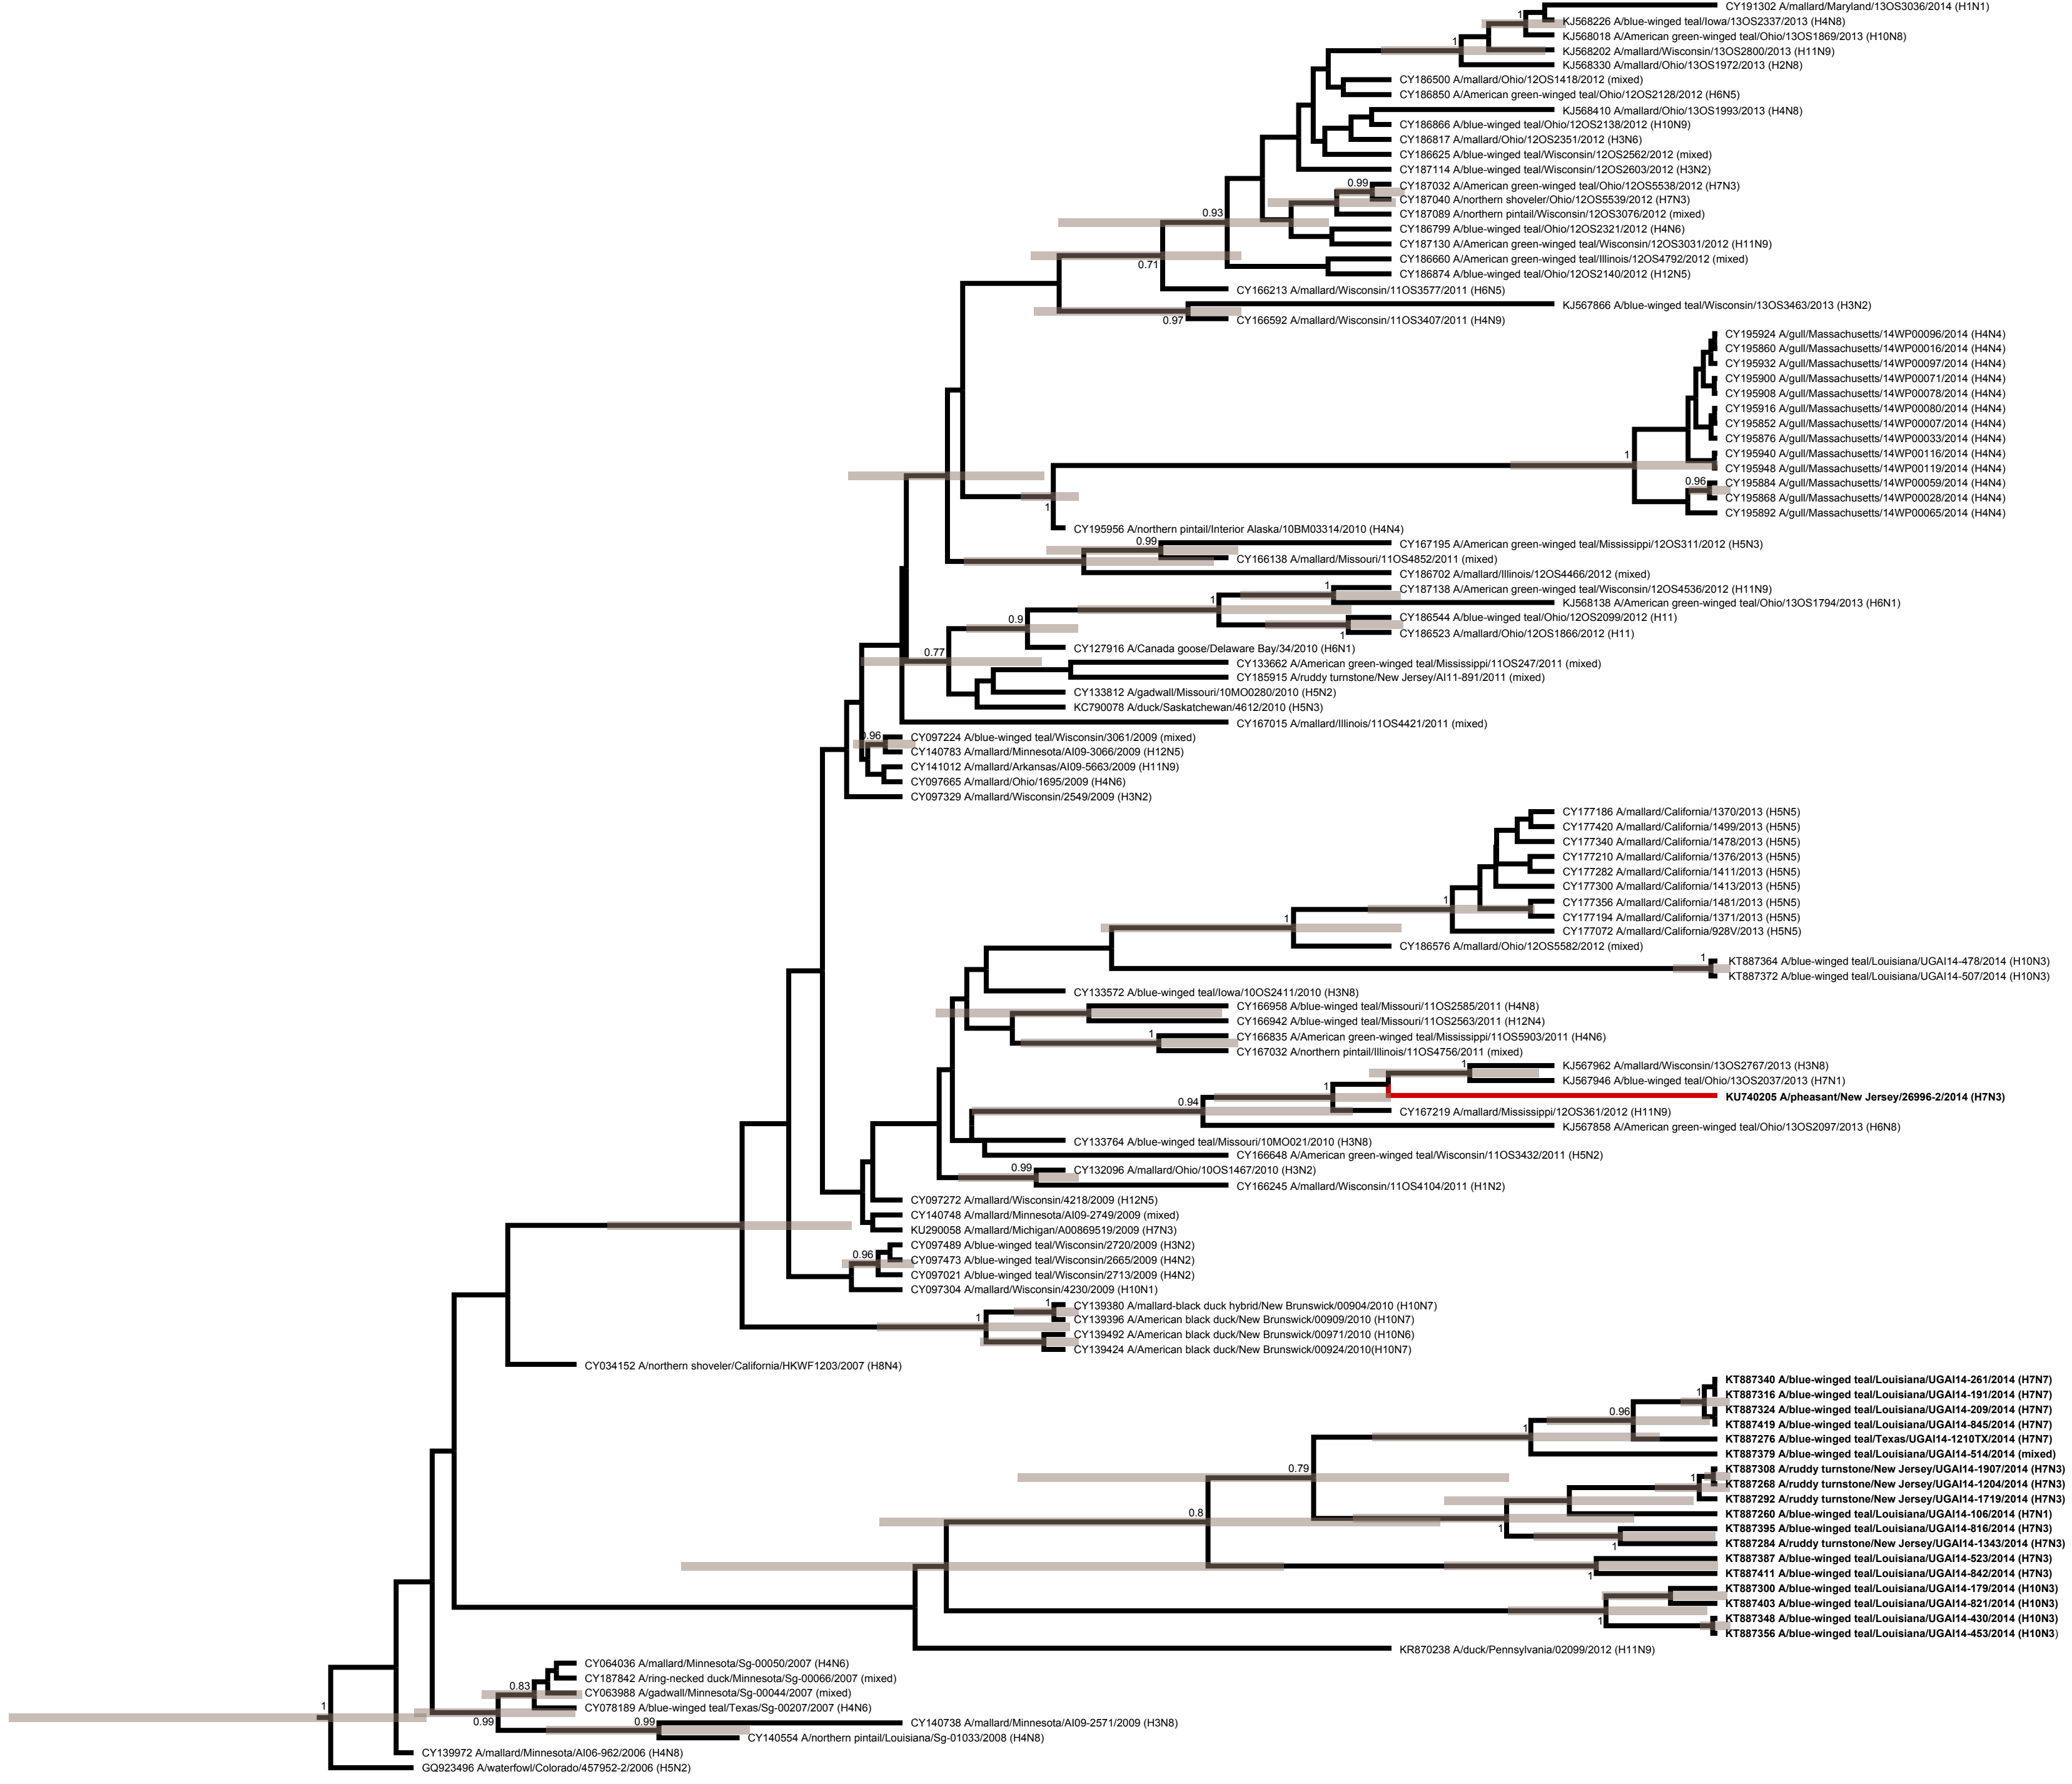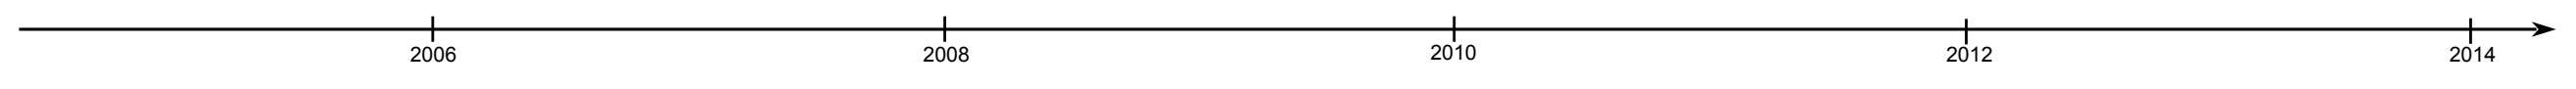



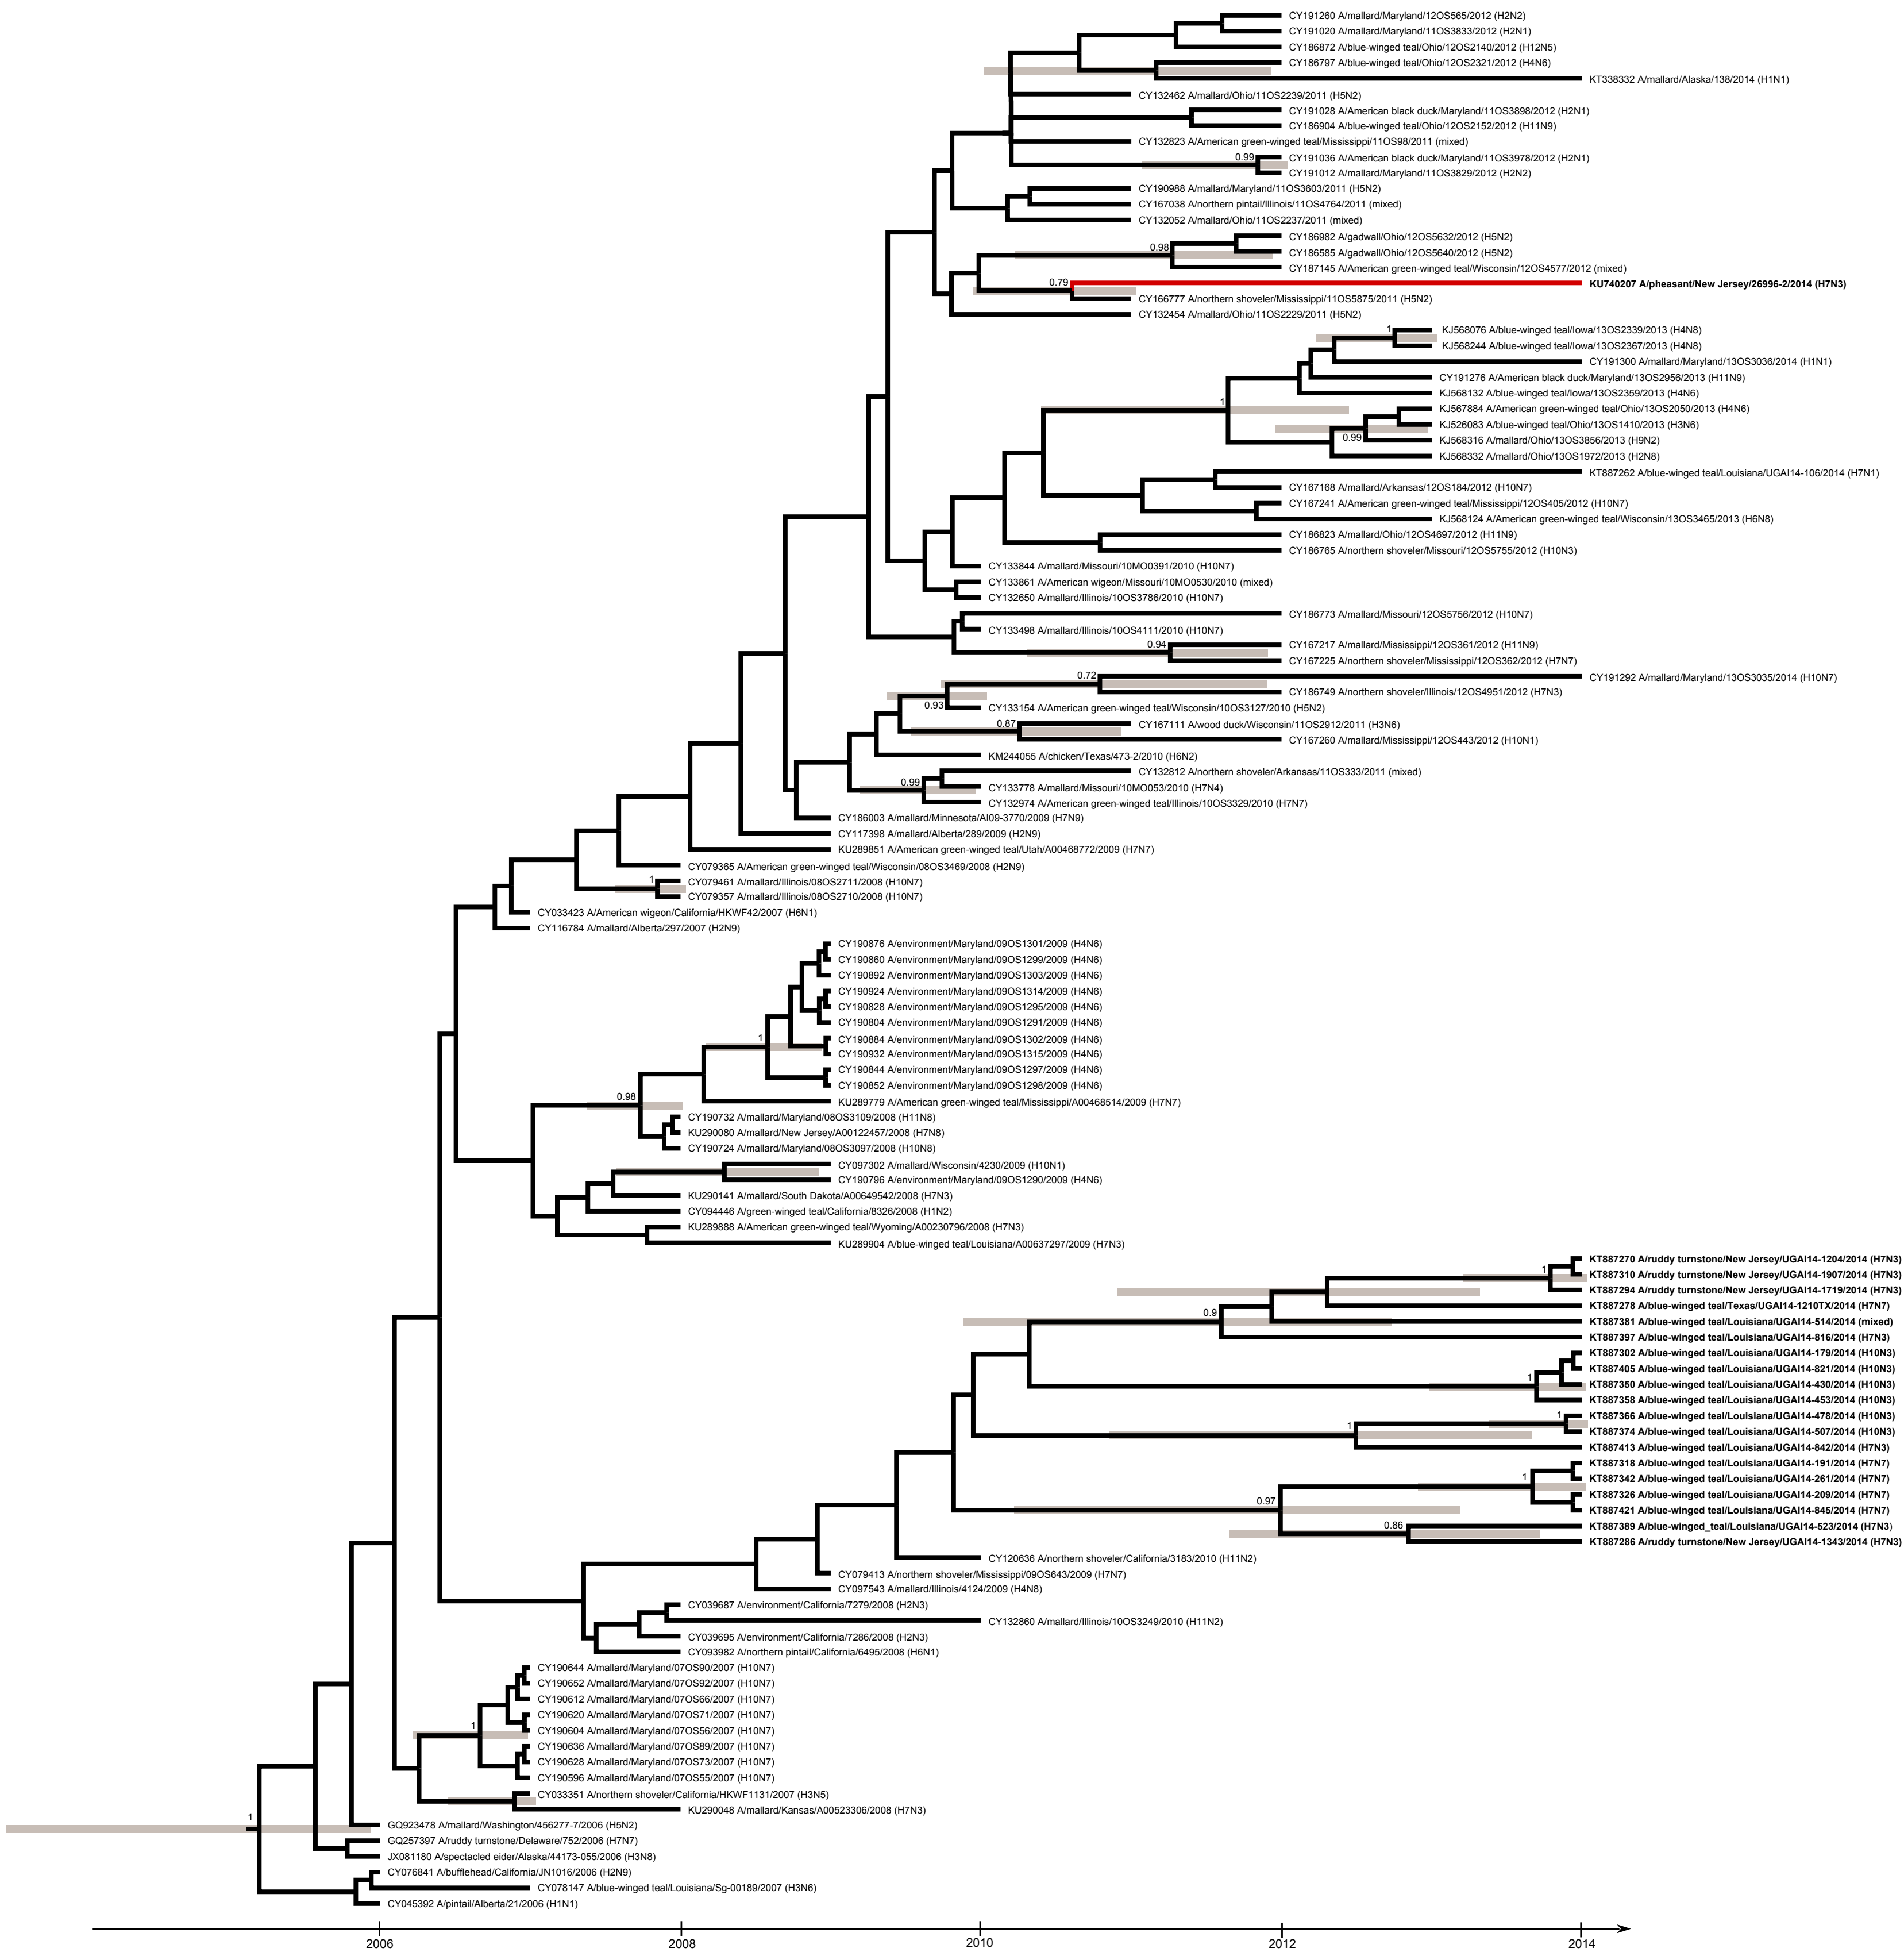

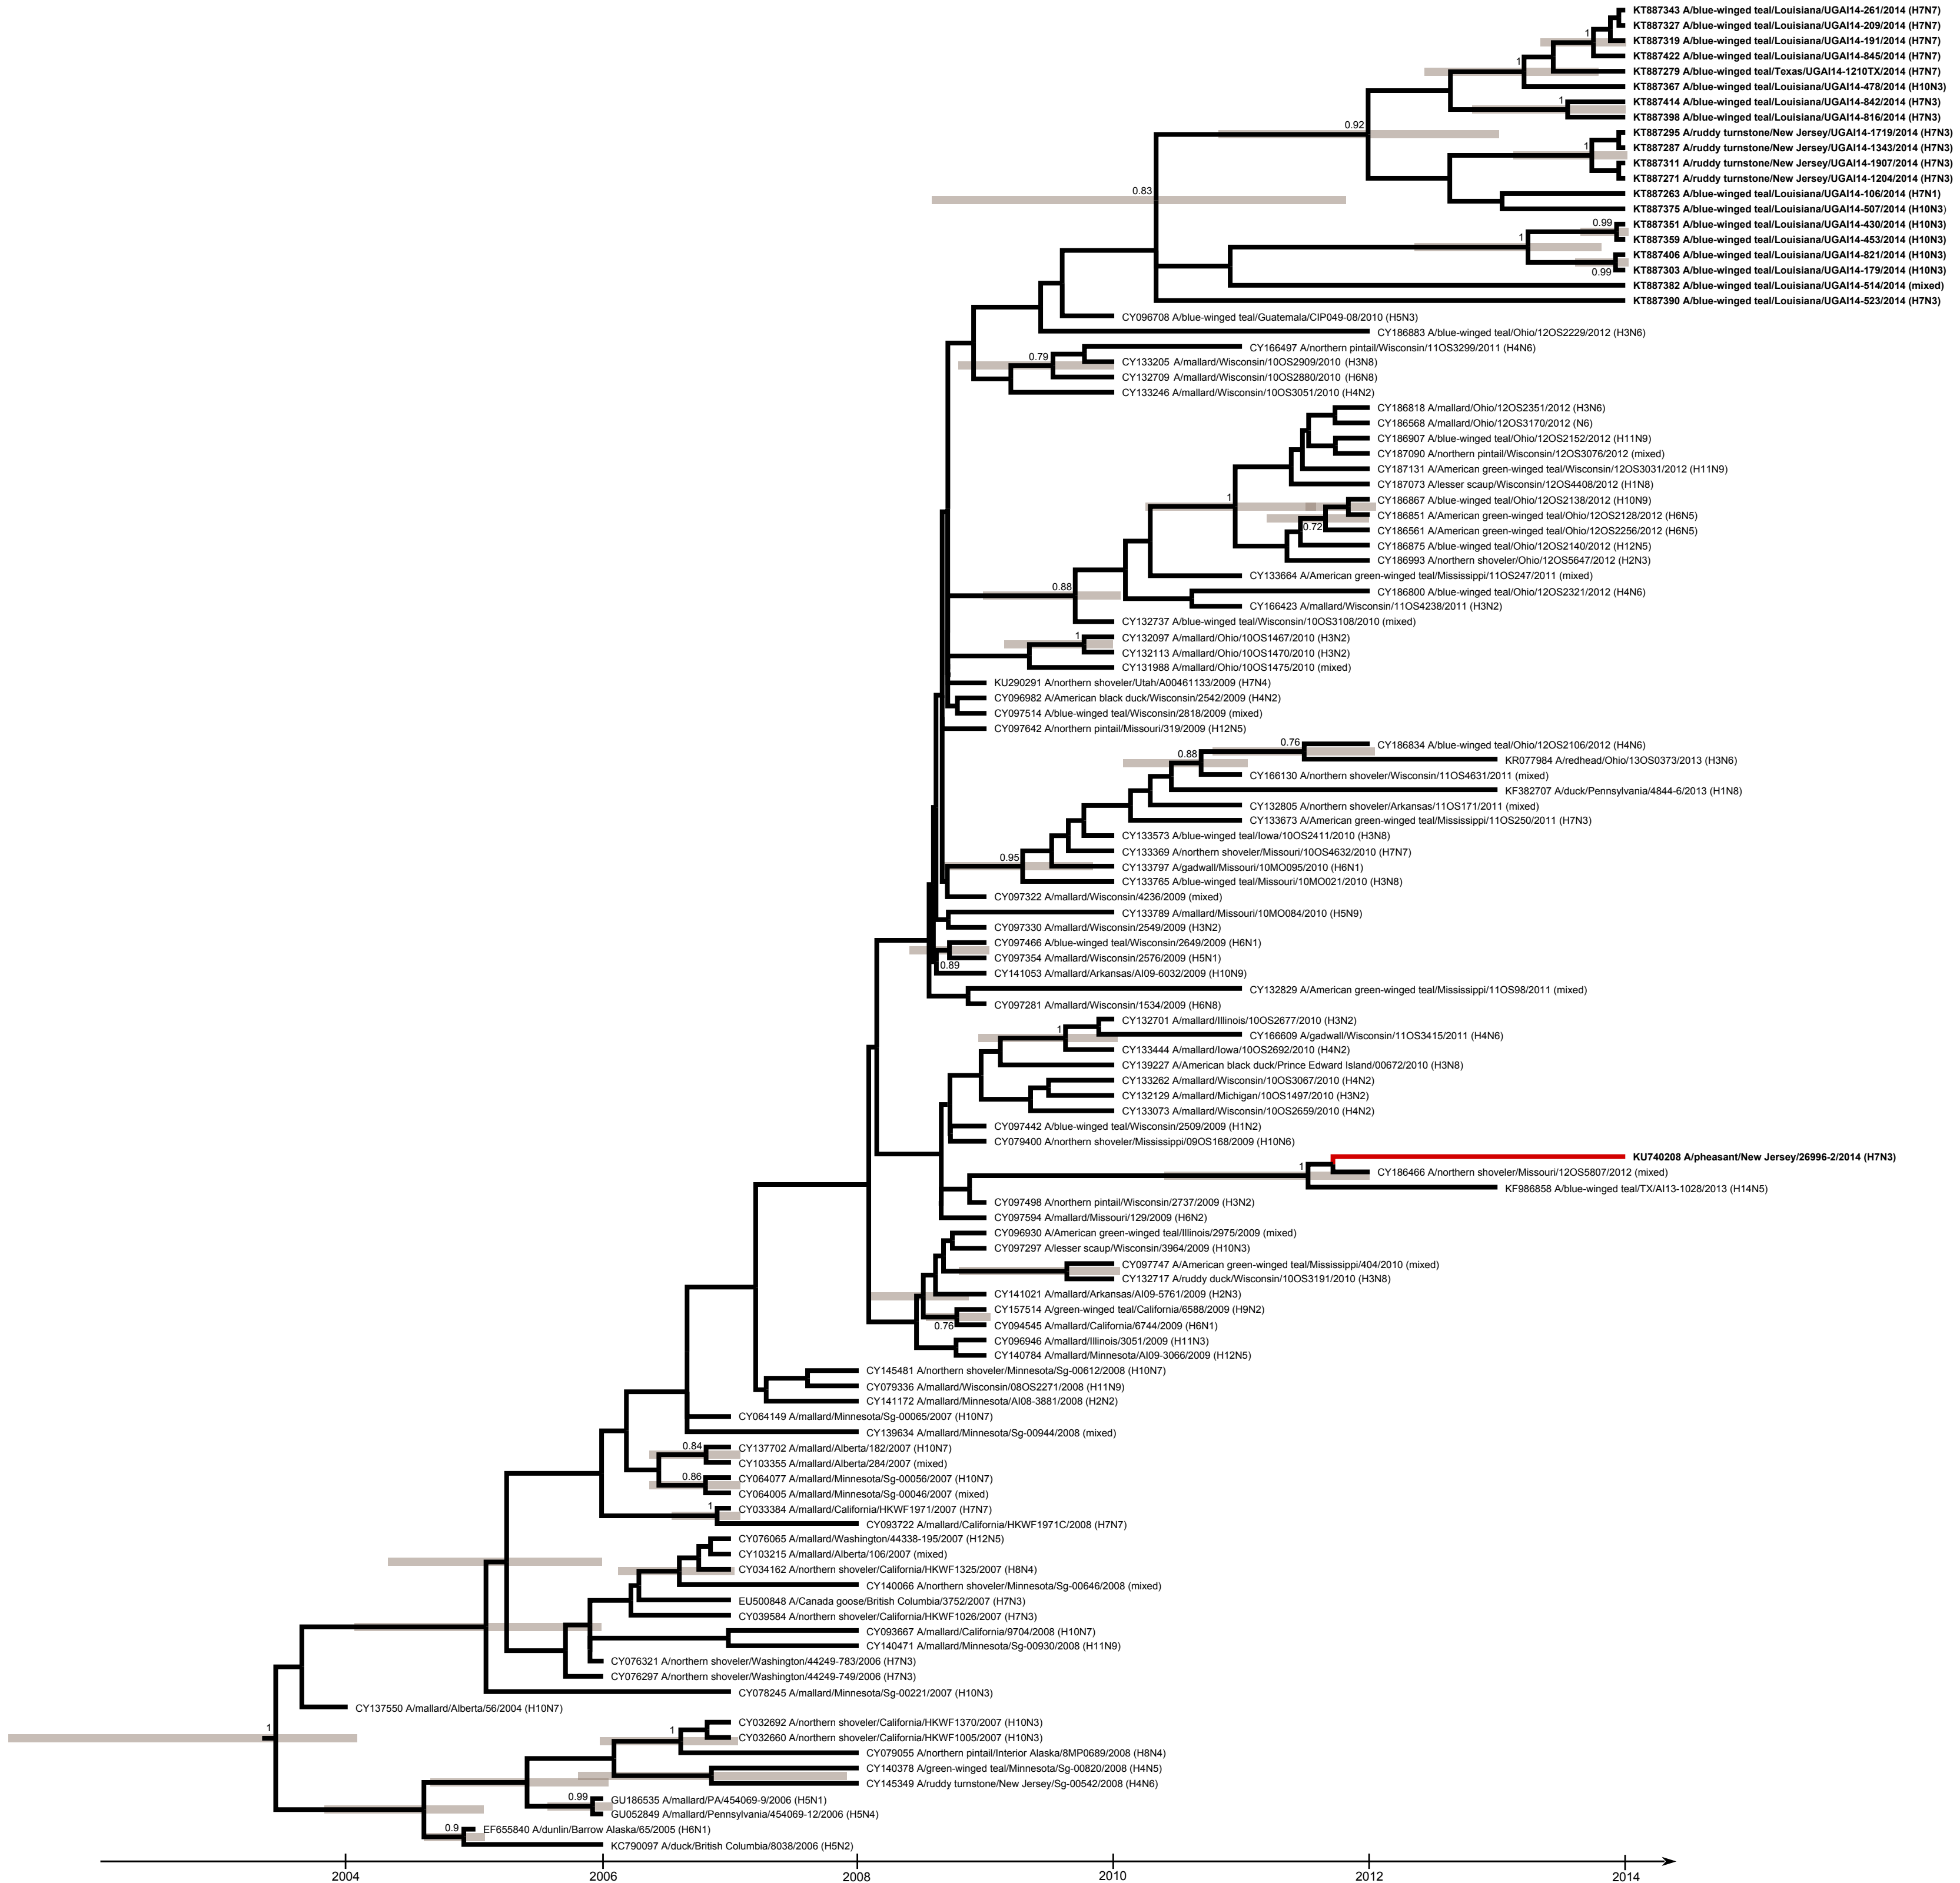

Supplement: NIHMS1979428-supplement-Supplementary_Figures_1_-_8.pdf [file NIHMS1979428-supplement-Supplementary_Figures_1_-_8.pdf]
