# Supplementary material
Source: PubMed Central journal article supplement (PMC11302360)
Supplement: NIHMS1979428-supplement-Supplementary_Material_2.pdf [file NIHMS1979428-supplement-Supplementary_Material_2.pdf]

## Supplemental Methods

*Post-hoc* MCC analyses were incorporated for internal gene segments to re-assess inference derived from calculations of genetic similarity regarding hitchhiking of internal gene segments. For these analyses, top BLAST hits [1] for each internal gene segment of A/pheasant/New Jersey/26996-2/2014 (H7N3) and sequences derived for this study incorporated in Bayesian Markov Chain Monte Carlo coalescent analyses performed with BEAST 1.7.4 [2]. The molecular clock (uncorrelated exponential, uncorrelated log-normal or strict clock) was selected following Bayes factors comparison. The SRD06 nucleotide substitution model [3] and a Bayesian skyline coalescent tree prior were used in all simulations [4]. Analyses were performed with chain lengths of 80–160 million generations sampled every 1000 iterations and the first 20–30% trees were discarded as burn-in. For the NS gene segment, sequences that did not share the same allele as A/pheasant/New Jersey/26996-2/2014 (H7N3) were excluded from analysis.

## References

1. Zhang Z, Schwartz S, Wagner L, Miller W (2000) A greedy algorithm for aligning DNA sequences. *J Comput Biol* 7:203–214.
2. Drummond AJ, Rambaut A (2007) BEAST: Bayesian evolutionary analysis by sampling trees. *BMC Evol Biol* 7:214.
3. Shapiro B, Rambaut A, Drummond, AJ (2006) Choosing appropriate substitution models for the phylogenetic analysis of protein-coding sequences. *Mol Biol Evol* 23:7–9.
4. Drummond AJ, Rambaut A, Shapiro B, Pybus OG (2005) Bayesian coalescent inference of past population dynamics from molecular sequences. *Mol Biol Evol* 22:1185–1192.
